# Supplementary material
Source: Springer Nature journal article supplement (https://www.springermedizin.de/resource/supplementary/12985_2010_1073_MOESM6_ESM.pdf/9609082)

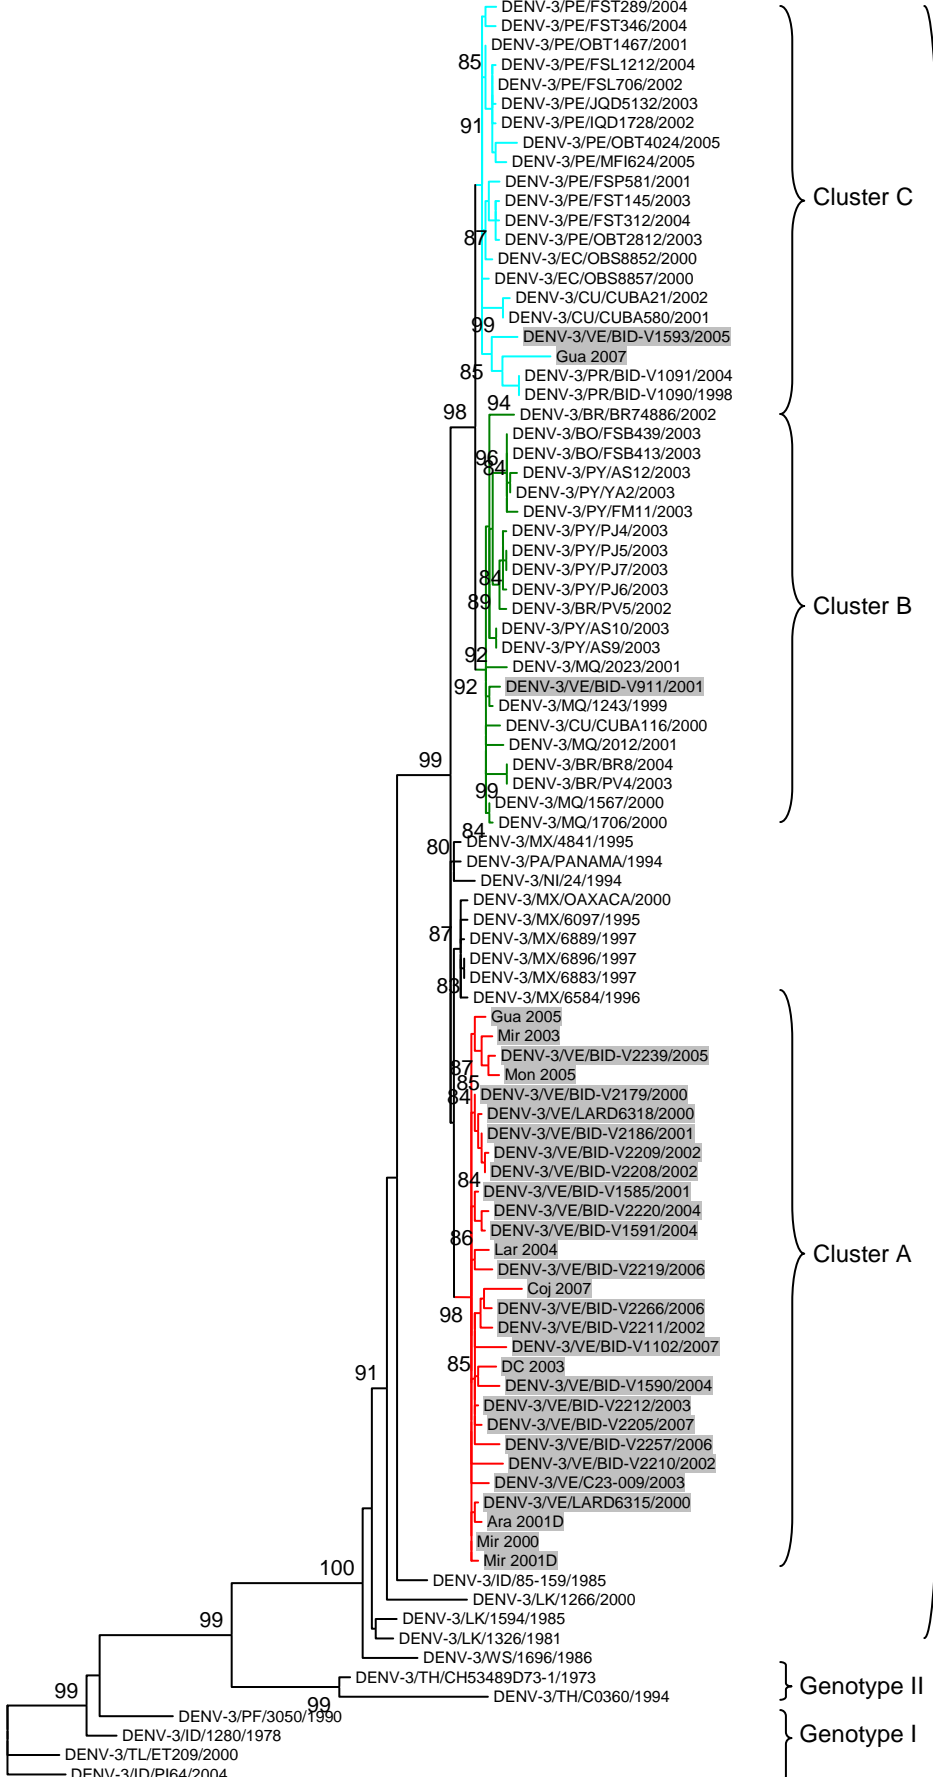

Cluster C

Cluster B

Cluster A

Genotype III

Genotype II

Genotype I

0.01

Supplement: MOESM6 [file 9609082]
